# Supplementary material for: The Influence of Air Nanobubbles on Controlling the Synthesis of Calcium Carbonate Crystals
Source: MDPI journal article supplement (doi:10.3390/ma15217437), 2022-10-23
Supplement: s1 [file s1]

Supplementary Materials

# The Influence of Air Nanobubbles on Controlling the Synthesis of Calcium Carbonate Crystals

Yongxiang Wu <sup>1</sup>, inyi Huang <sup>1</sup>, Chunlin He <sup>1</sup>, Kaituo Wang <sup>1</sup>, Nguyen Thi Hong Nhung <sup>1</sup>, Siming Lu <sup>2</sup>, Gjergj Dodbiba <sup>3</sup>, Akira Otsuki <sup>4,5</sup> and Toyohisa Fujita <sup>1,\*</sup>

**Citation:** Wu, Y.; Huang, M.; He, C.; Wang, K.; Nhung, N.T.H.; Lu, S.; Dodbiba, G.; Otsuki, A.; Fujita, T. The Influence of Air Nanobubbles on Controlling the Synthesis of Calcium Carbonate Crystals. *Materials* **2022**, *15*, 7437. <https://doi.org/10.3390/ma15217437>

Academic Editor: Carlos Javier Duran-Valle

Received: 2 October 2022 Accepted: 20 October 2022 Published: 23 October 2022

**Publisher's Note:** MDPI stays neutral with regard to jurisdictional claims in published maps and institutional affiliations.

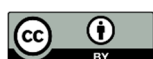

**Copyright:** © 2022 by the authors. Licensee MDPI, Basel, Switzerland. This article is an open access article distributed under the terms and conditions of the Creative Commons Attribution (CC BY) license (<https://creativecommons.org/licenses/by/4.0/>).

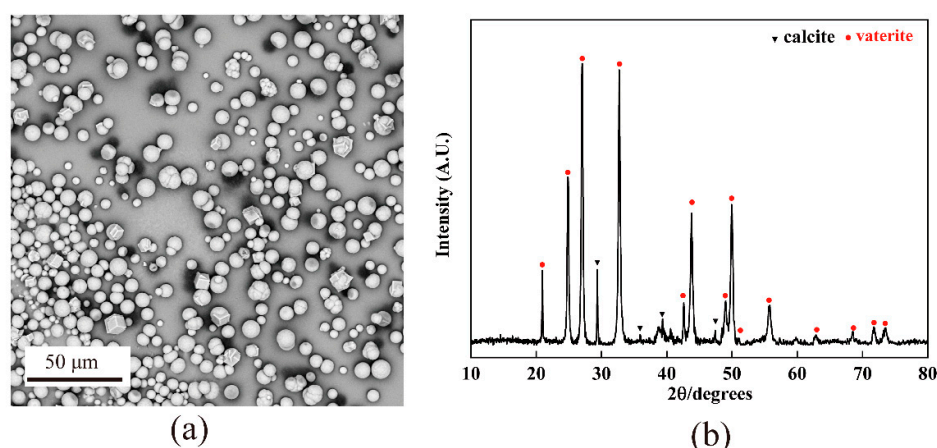

**Figure S1.** SEM images and XRD parts of vaterite obtained

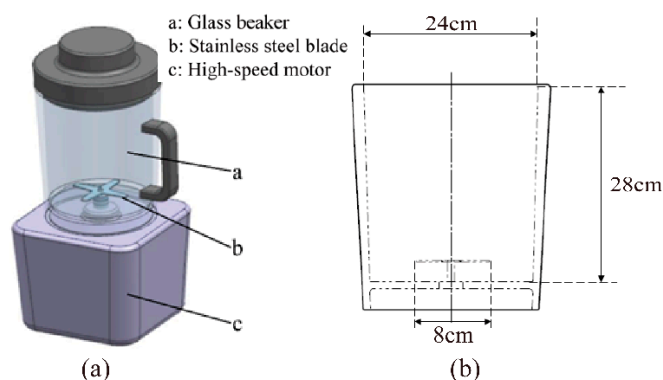

**Figure S2.** The schematic diagram of the machine for producing bulk nanobubbles(a), and the size of the stain-less-steel blade and beaker (b).

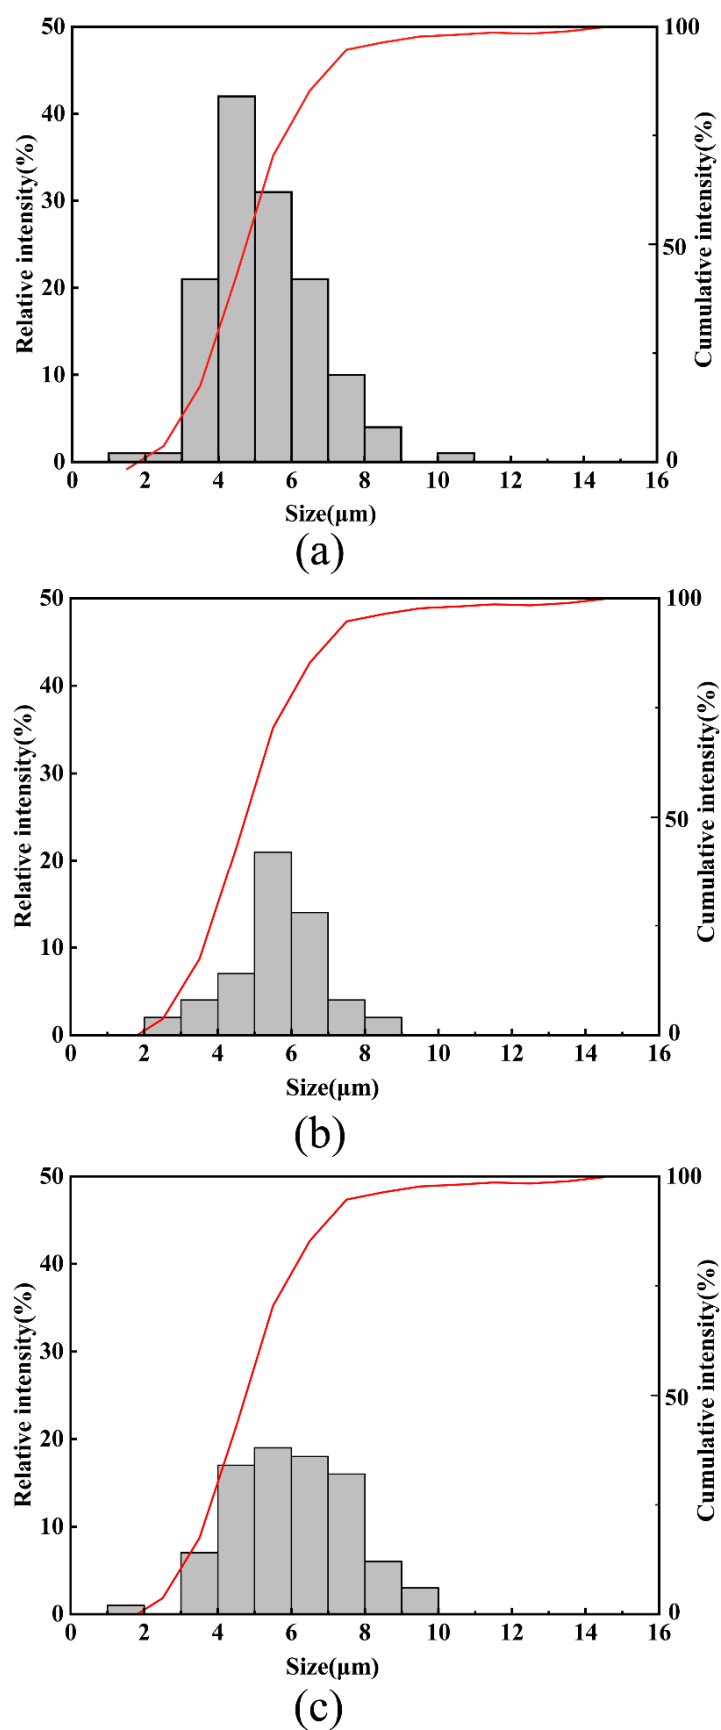

**Figure S3.** Size distribution of calcite after 4 hours (a), size distribution of calcite after 1 hours, and size distribution of vaterite after 1 hours prepared in  $2.96 \times 10^8$  particles/mL of nanobubbles water.

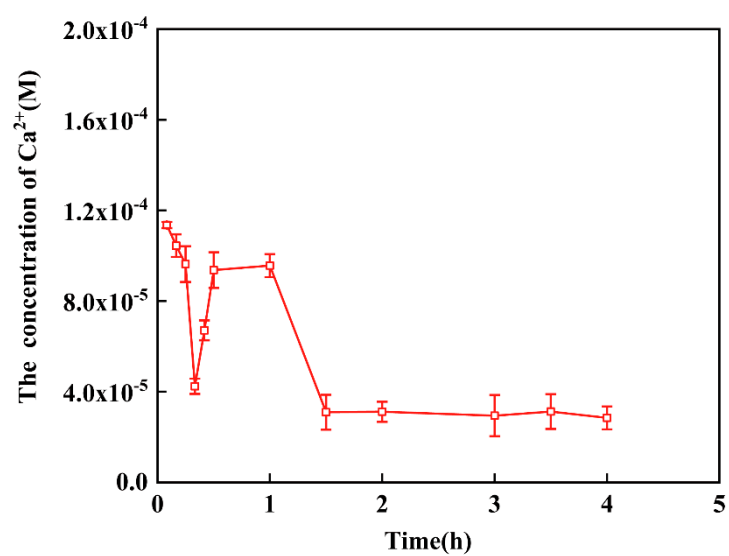

**Figure S4.** The concentration of  $\text{Ca}^{2+}$  depending on the time in the solution filtrated at  $0.45 \mu\text{m}$  after the reaction to prepare  $\text{CaCO}_3$
